# Supplementary material
Source: PubMed Central journal article supplement (PMC9998508)
Supplement: 41392_2023_1386_MOESM2_ESM.pdf [file 41392_2023_1386_MOESM2_ESM.pdf]

Figure 1a

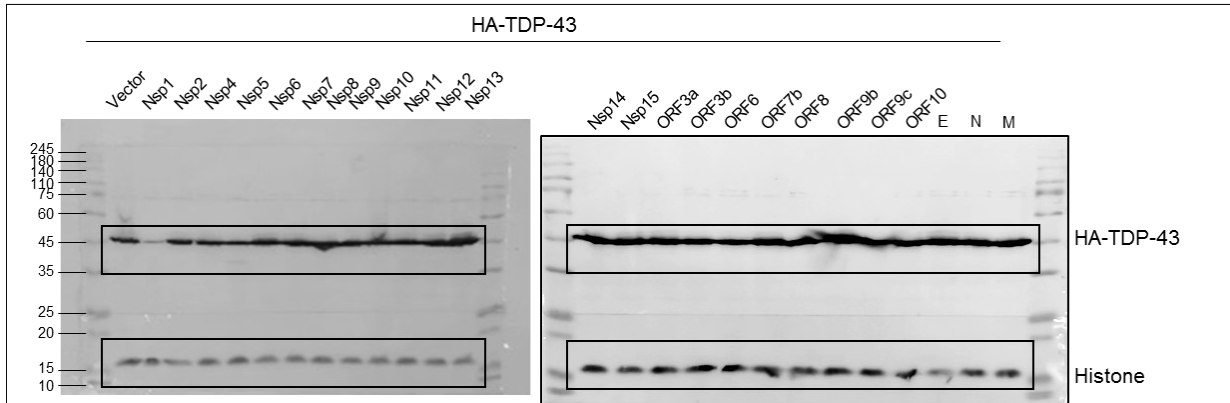

Figure 1b

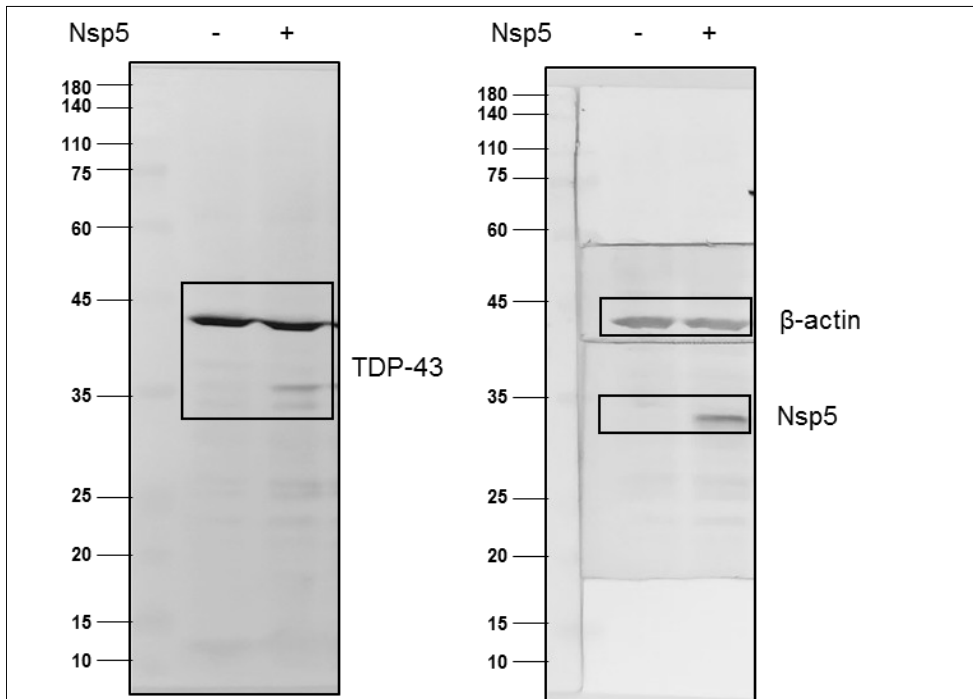

Figure 1c

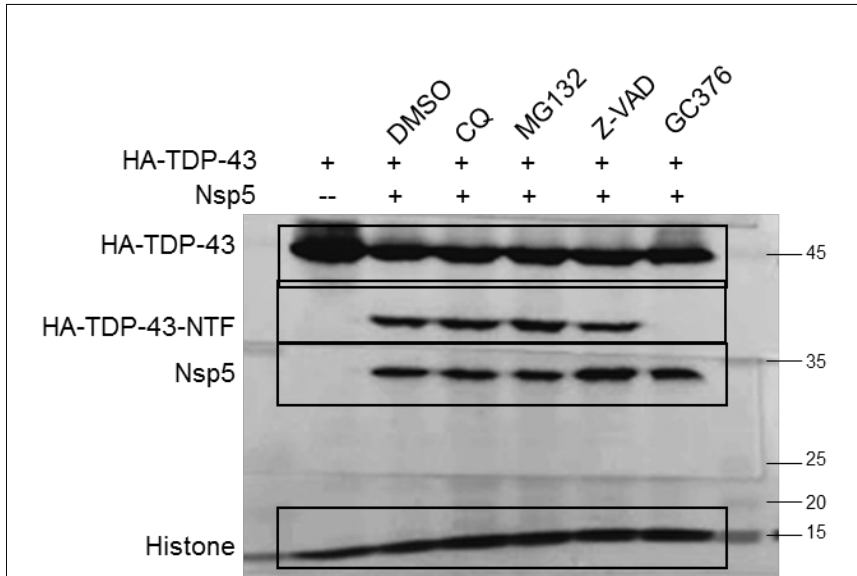

Figure 1d

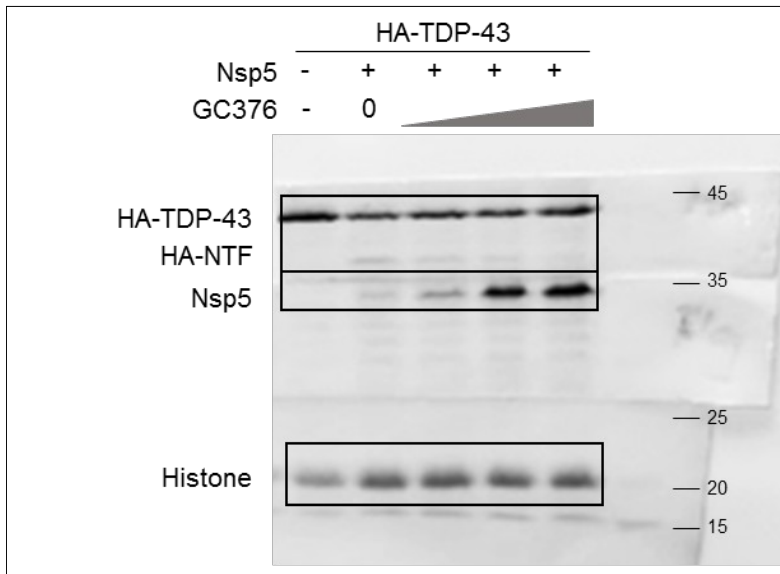

Figure 1e

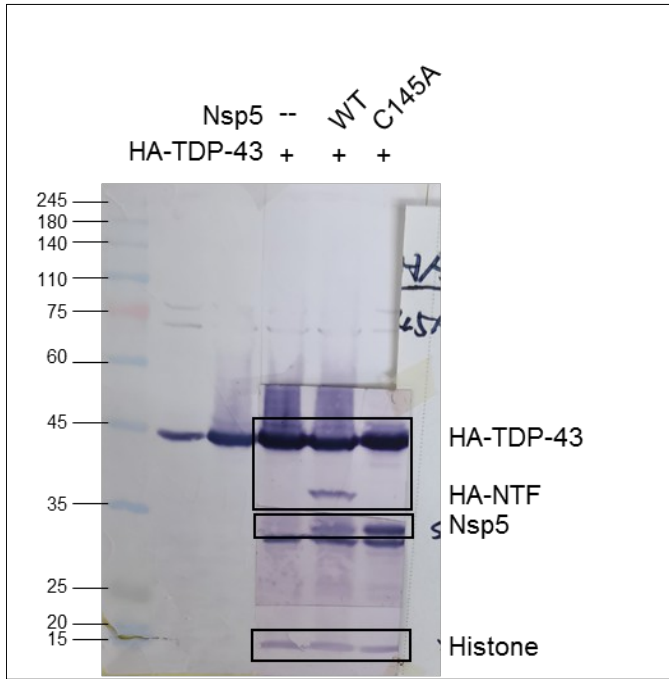

Figure 1f

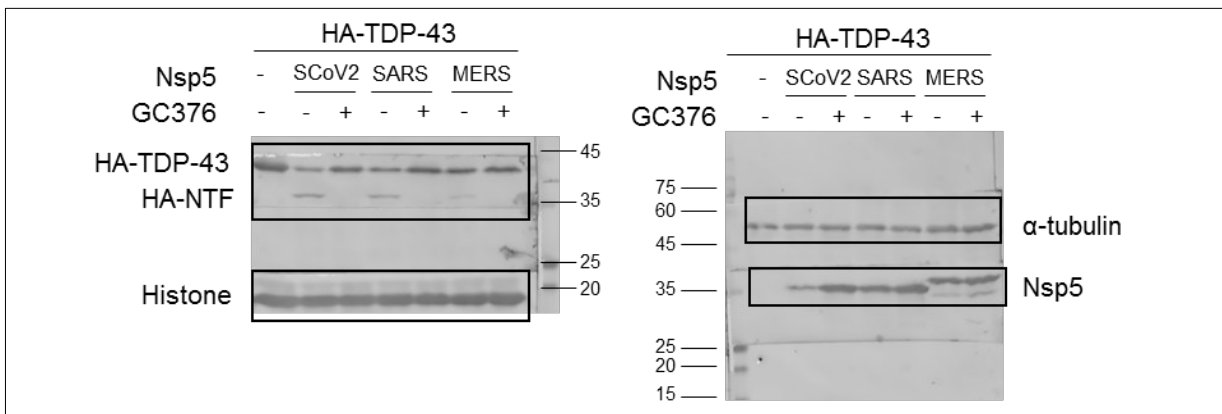

Figure 1i

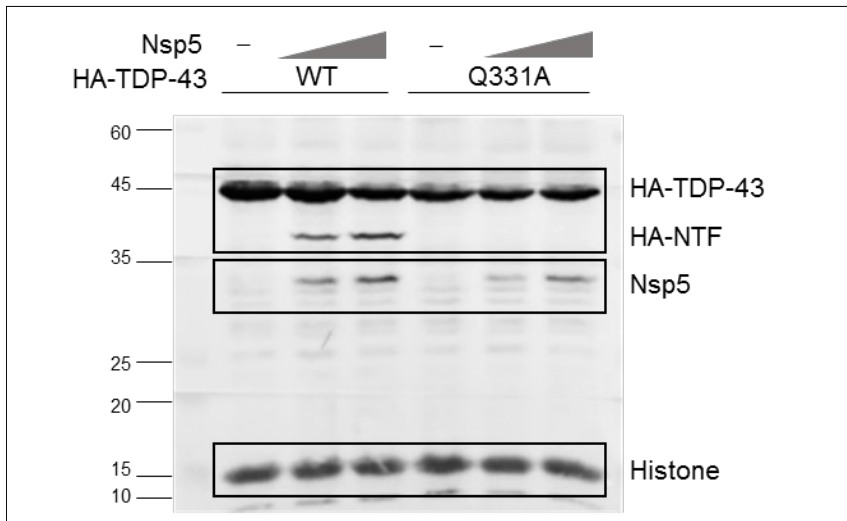

Figure 1j

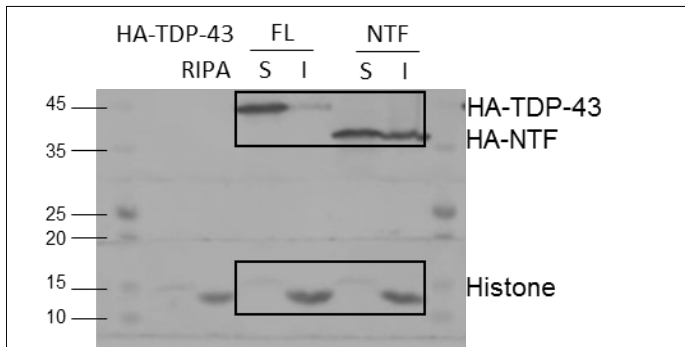



Figure 1k

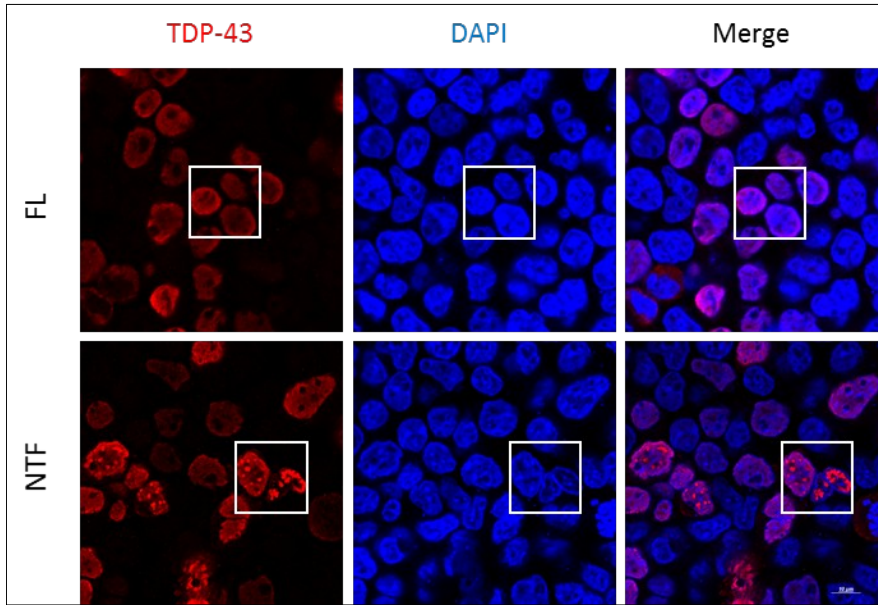

Figure 1m

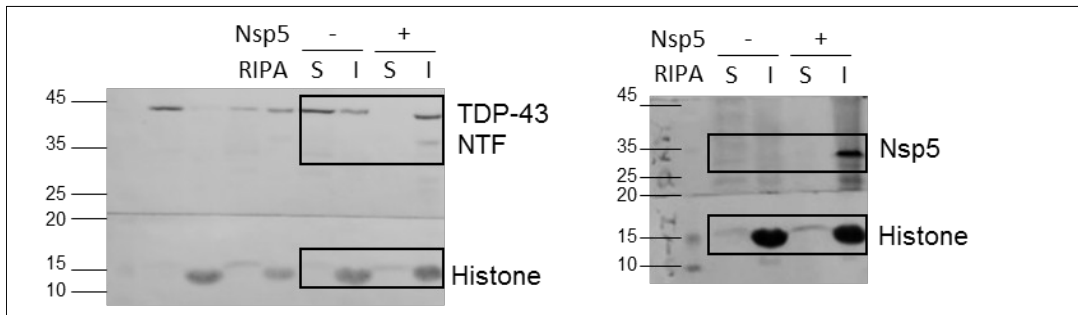

Figure 1n

SH-SY5Y

| TDP-43   | -     | WT    |       |       | Q331A |       |       |
|----------|-------|-------|-------|-------|-------|-------|-------|
| Nsp5(ng) | 0     | 0     | 100   | 200   | 0     | 100   | 200   |
|          | 0.372 | 0.471 | 0.517 | 0.585 | 0.515 | 0.521 | 0.563 |
|          | 0.403 | 0.457 | 0.547 | 0.607 | 0.548 | 0.536 | 0.591 |
|          | 0.404 | 0.469 | 0.546 | 0.604 | 0.521 | 0.506 | 0.58  |

Figure 1o

SH-SY5Y

|  | Vector | Nsp5  | Nsp5+GC376 |
|--|--------|-------|------------|
|  | 0.169  | 0.205 | 0.19       |
|  | 0.189  | 0.213 | 0.197      |
|  | 0.186  | 0.212 | 0.192      |

Figure 1p

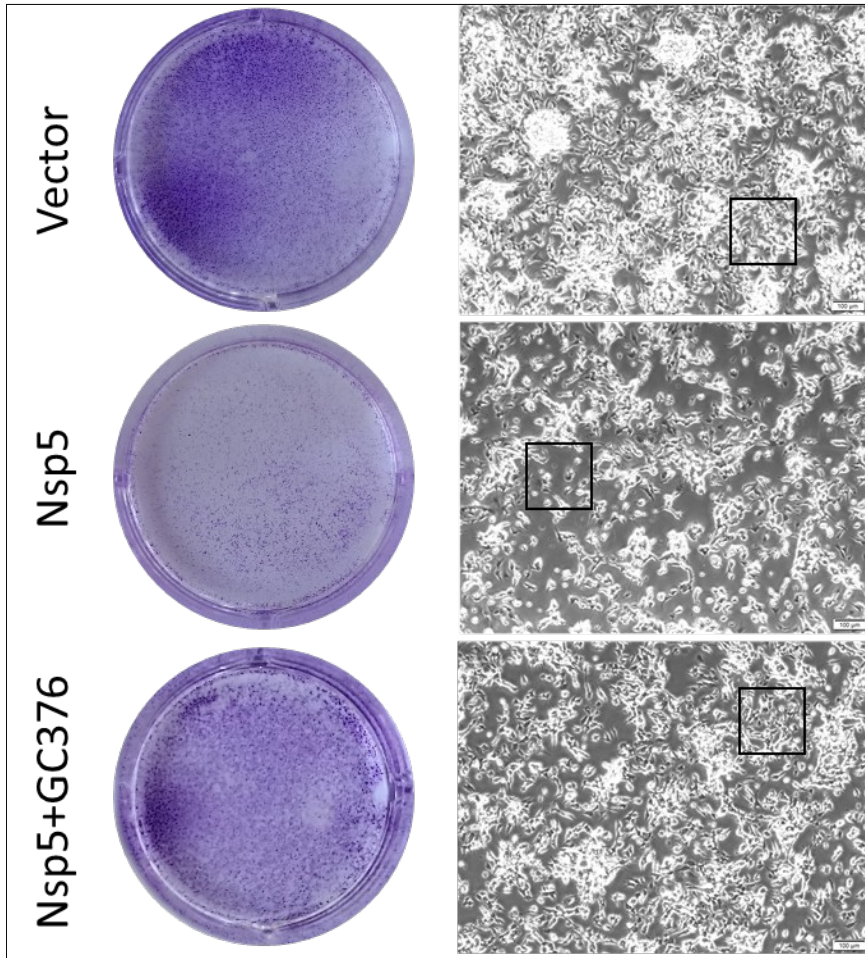

Figure S1b

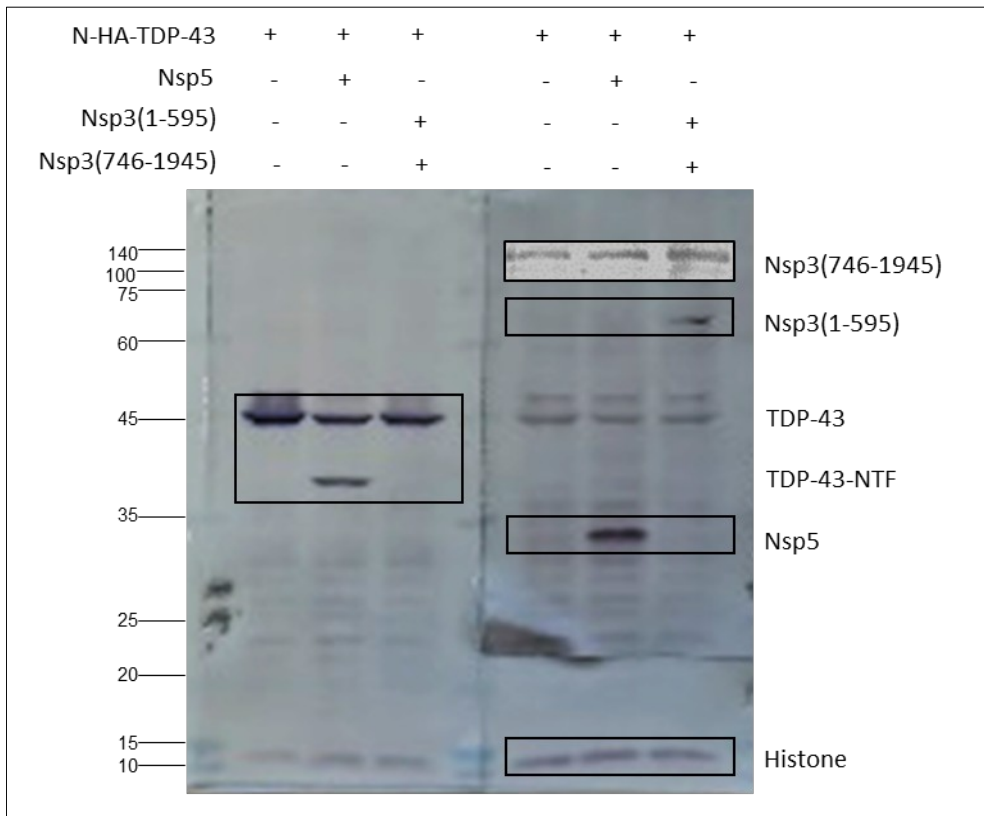

Figure S1c

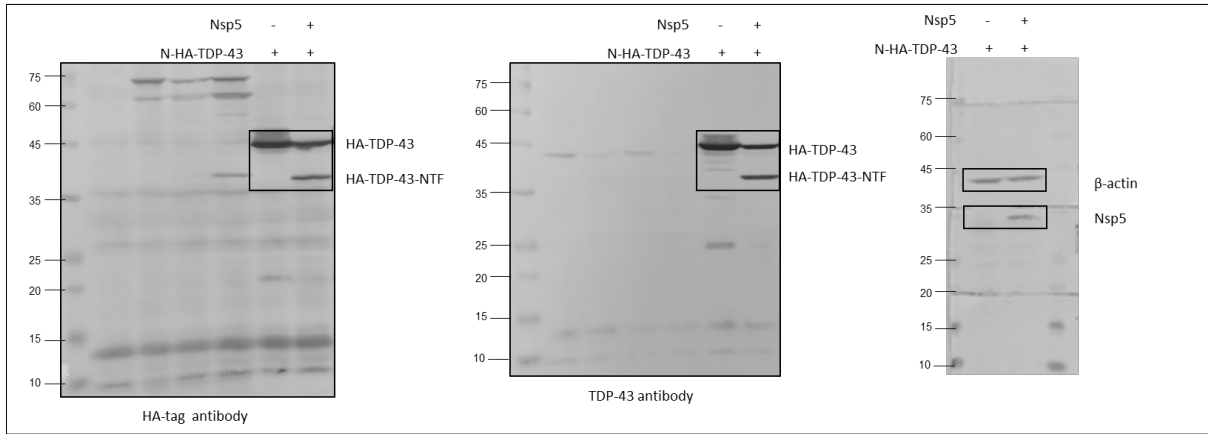

Figure S2b

| GC376( $\mu\text{M}$ ) | Blank | 0     | 0.001 | 0.01  | 0.1   | 1     | 10    | 100   |
|------------------------|-------|-------|-------|-------|-------|-------|-------|-------|
| OD450                  | 0.337 | 1.931 | 1.959 | 2.041 | 1.823 | 1.946 | 1.897 | 1.734 |
|                        | 0.291 | 1.743 | 1.884 | 1.915 | 1.661 | 1.691 | 1.561 | 1.401 |
|                        | 0.309 | 1.725 | 1.876 | 1.676 | 1.851 | 1.614 | 1.675 | 1.299 |



Figure S4

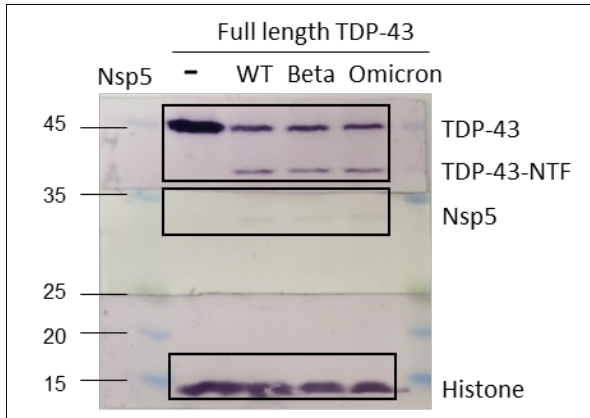



Figure S6

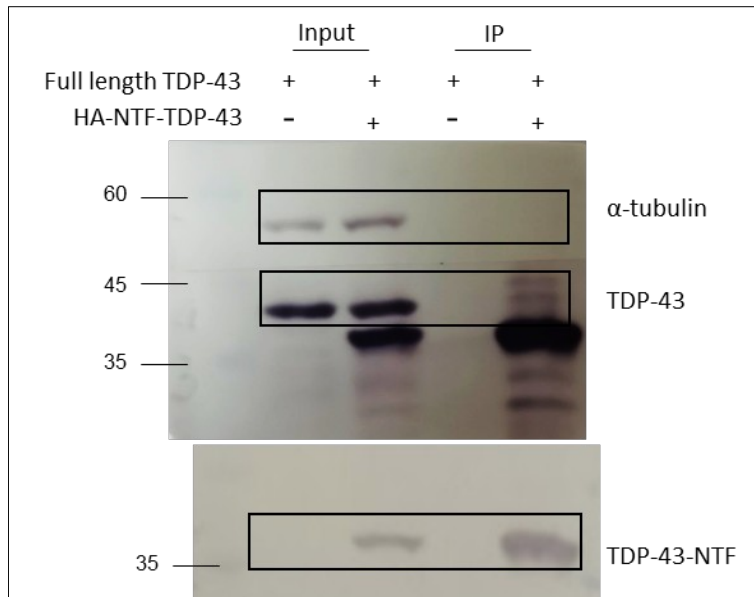

Figure S7

T98G

| TDP-43   | -     | WT    |       |       | Q331A |       |       |
|----------|-------|-------|-------|-------|-------|-------|-------|
| Nsp5(ng) | 0     | 0     | 100   | 200   | 0     | 100   | 200   |
|          | 0.391 | 0.408 | 0.424 | 0.426 | 0.413 | 0.433 | 0.457 |
|          | 0.375 | 0.386 | 0.415 | 0.428 | 0.428 | 0.437 | 0.47  |
|          | 0.371 | 0.381 | 0.4   | 0.42  | 0.419 | 0.421 | 0.457 |

Figure S8

| SH-SY5Y | Vector | TDP-43-Q331A | Nsp5  | Nsp5+TDP-43-Q331A |
|---------|--------|--------------|-------|-------------------|
|         | 0.408  | 0.416        | 0.431 | 0.408             |
|         | 0.413  | 0.421        | 0.442 | 0.421             |
|         | 0.404  | 0.422        | 0.442 | 0.421             |

Figure S9

SH-SY5Y

| GC376( $\mu$ M) | Blank | 0     | 0.01  | 0.1   | 1     | 10    | 100   |
|-----------------|-------|-------|-------|-------|-------|-------|-------|
| OD450           | 0.408 | 0.557 | 0.566 | 0.573 | 0.547 | 0.578 | 0.556 |
|                 | 0.415 | 0.563 | 0.575 | 0.564 | 0.594 | 0.547 | 0.595 |
|                 | 0.39  | 0.556 | 0.576 | 0.545 | 0.556 | 0.571 | 0.565 |
